# Supplementary material
Source: MDPI journal article supplement (https://www.mdpi.com/search?q=molecules-23-03359)
Supplement: s001 [file molecules-23-03359-s001.pdf]

# Qualitative and Quantitative Analysis of C-glycosyl-flavones of *Iris lactea* Leaves by Liquid Chromatography/Tandem Mass Spectrometry

Dan Chen <sup>1</sup>, Yu Meng<sup>1</sup>, Yan Zhu <sup>1</sup>, Gang Wu <sup>1</sup>, Jun Yuan <sup>2</sup>, Minjian Qin <sup>1,\*</sup> and Guoyong Xie <sup>1,\*</sup>

<sup>1</sup> Department of Resources Science of Traditional Chinese Medicines, School of Traditional Chinese Pharmacy, China Pharmaceutical University, #24 Tongjiaxiang, Gulou District, Nanjing 210009, China. 1721020319@stu.cpu.edu.cn (D.C.); mengyu19900616@163.com (Y.M.); cpuzy@126.com (Y.Z.); woosmail@163.com (G.W.)

<sup>2</sup> Jiangsu Key Laboratory of Regional Resource Exploitation and Medicinal Research, Huaiyin Institute of Technology, Huai'an 223003, Jiangsu, China. yuanjun1109@126.com

\* Correspondence: qmj@cpu.edu.cn (M.Q.); 1020142423@cpu.edu.cn (G.X.); Tel.: +86-(0)25-8618-5130 (M.Q. and G.X.)

## Supplementary caption

**Figure S1.** Structure of the twenty-two compounds

**Figure S2.** Results of single factor experiments

**Figure S3.** RMS plots for the interaction of the variables in 3D and 2D

**Figure S4.** Calibration curves of six reference compounds

**Table S1.** Program and test of RSM

**Table S2.** Analysis of variance for quadratic model

**Table S3.** Test result of significance for regression coefficient

**Table S4.** Results of intra-day precision test

**Table S5.** Results of inter-day precision test

**Table S6.** Results of repeatability test

**Table S7.** Results of stability test

**Table S8.** Results of recovery test

**Table S9.** Levels of the response surface test

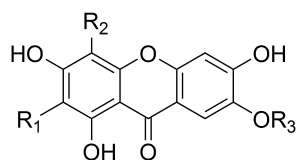

A1: R1=Glc R2=H R3=Glc  
 A3: R1=Glc R2=H R3=H  
 A4: R1=H R2=Glc R3=H

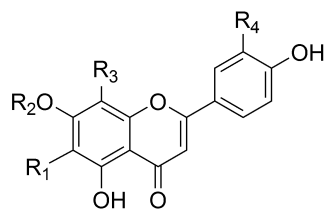

A2: R1=Glc R2=Glc R3=H R4=H  
 A5: R1=Glc R2=H R3=H R4=OH  
 A6: R1=Glc R2=CH<sub>3</sub> R3=H R4=OH  
 A7: R1=Glc R2=H R3=H R4=H  
 A8: R1=H R2=H R3=Glc R4=OCH<sub>3</sub>

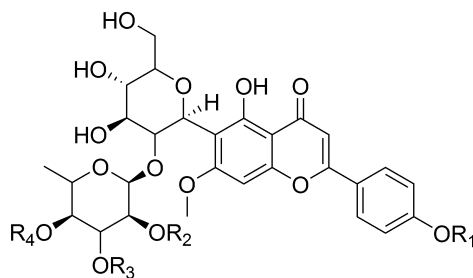

A9: R1=Glc R2=H R3=H R4=H  
 A10: R1=Glc R2=H R3=H R4=COCH<sub>3</sub>  
 A11: R1=CH<sub>3</sub> R2=H R3=H R4=H  
 A14: R1=CH<sub>3</sub> R2=COCH<sub>3</sub> R3=H R4=H  
 A16: R1=CH<sub>3</sub> R2=H R3=COCH<sub>3</sub> R4=H  
 A18: R1=CH<sub>3</sub> R2=H R3=H R4=COCH<sub>3</sub>  
 A21: R1=CH<sub>3</sub> R2=COCH<sub>3</sub> R3=COCH<sub>3</sub> R4=H  
 A22: R1=CH<sub>3</sub> R2=COCH<sub>3</sub> R3=H R4=COCH<sub>3</sub>

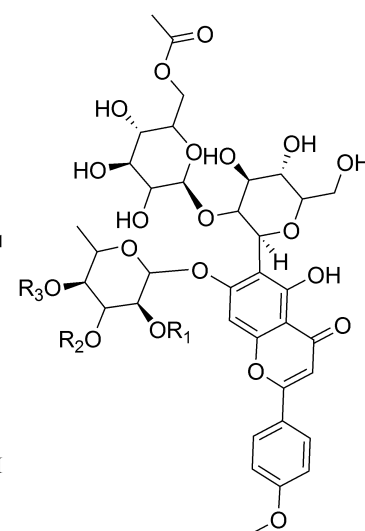

A15: R1=H R2=H R3=COCH<sub>3</sub>  
 A19: R1=COCH<sub>3</sub> R2=H R3=COCH<sub>3</sub>

Figure S1

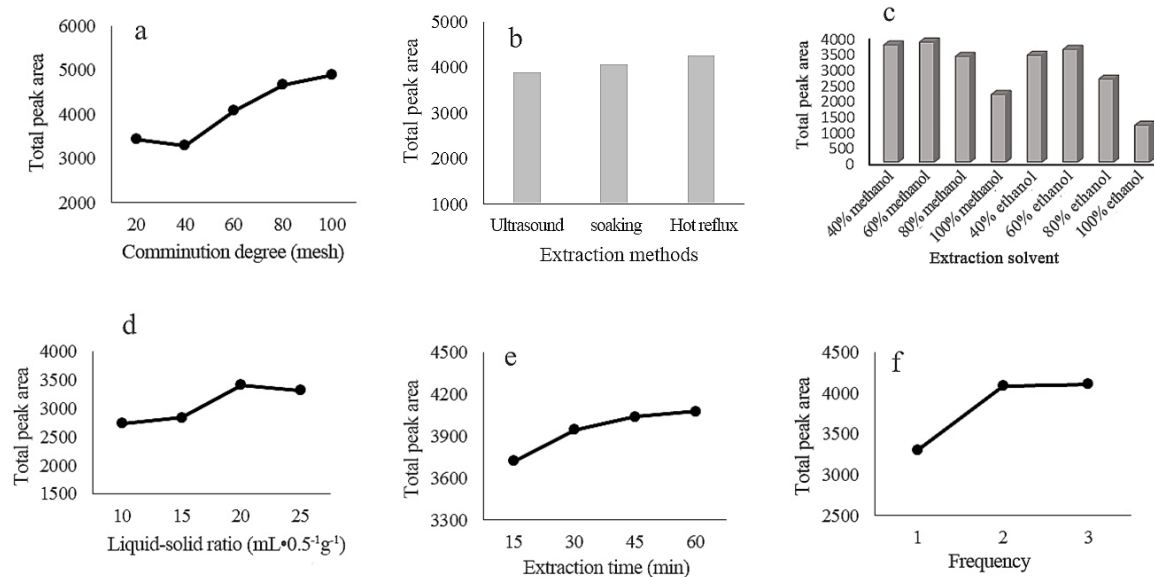

Figure S2

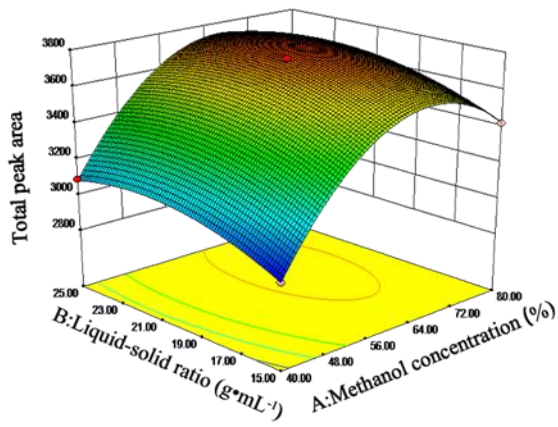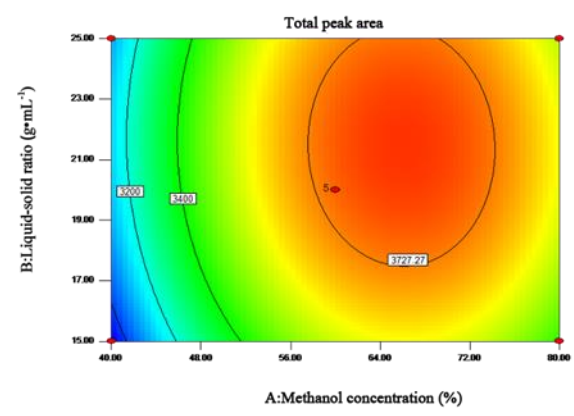

a

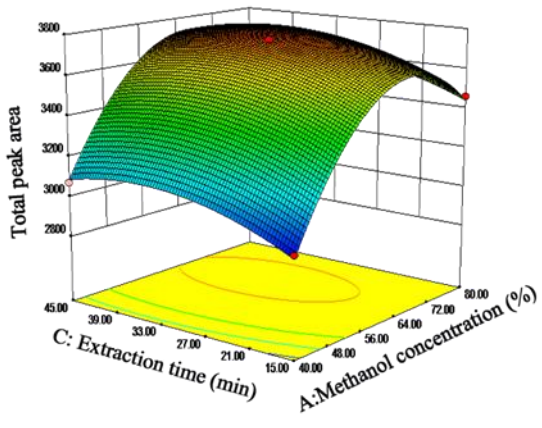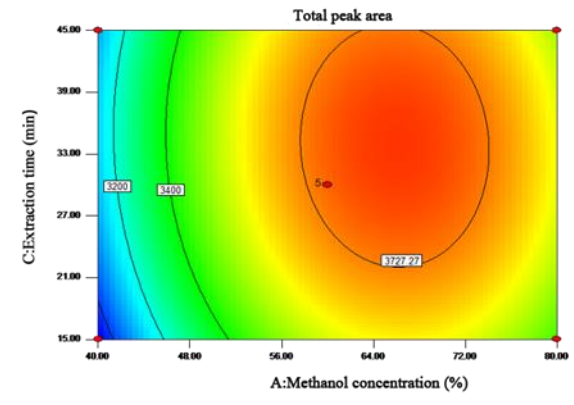

b

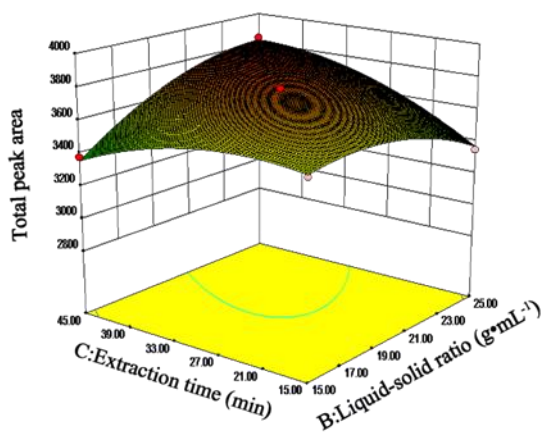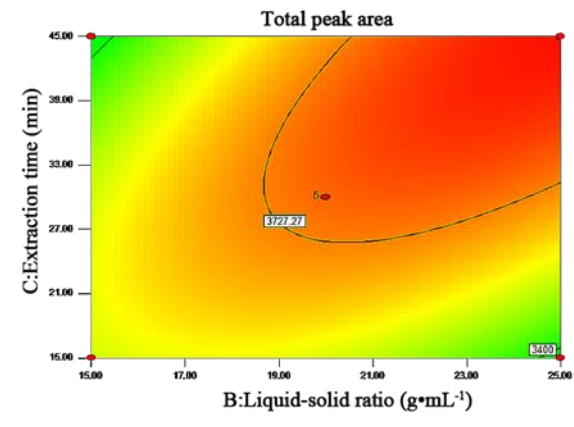

c

Figure S3

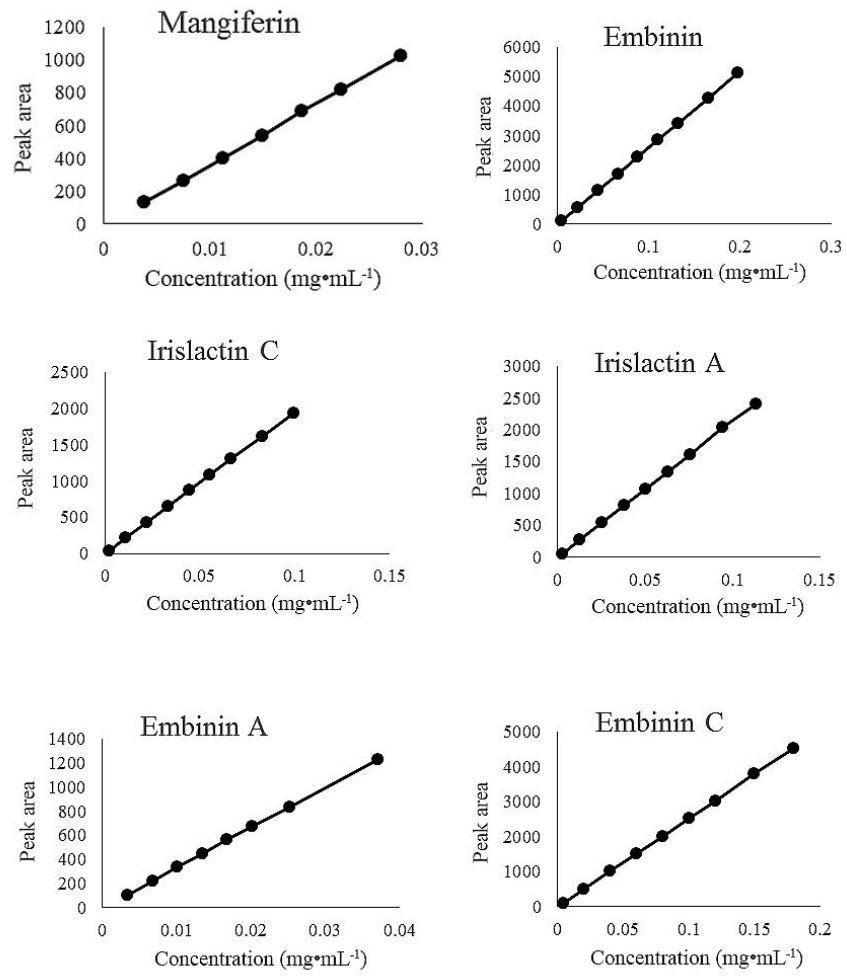

Figure S4

**Table S1**

| Std | Run | A<br>(methanol concentration) | B<br>(liquid-solid ratio) | C<br>(extraction time) | Y<br>(total peak area / $\times 10^3$ ) |
|-----|-----|-------------------------------|---------------------------|------------------------|-----------------------------------------|
| 2   | 1   | 80.00                         | 15.00                     | 30.00                  | 3.42                                    |
| 14  | 2   | 60.00                         | 20.00                     | 30.00                  | 3.76                                    |
| 8   | 3   | 80.00                         | 20.00                     | 45.00                  | 3.51                                    |
| 1   | 4   | 40.00                         | 15.00                     | 30.00                  | 2.93                                    |
| 10  | 5   | 60.00                         | 25.00                     | 15.00                  | 3.35                                    |
| 15  | 6   | 60.00                         | 20.00                     | 30.00                  | 3.73                                    |
| 12  | 7   | 60.00                         | 25.00                     | 45.00                  | 3.84                                    |
| 17  | 8   | 60.00                         | 20.00                     | 30.00                  | 3.75                                    |
| 4   | 9   | 80.00                         | 25.00                     | 30.00                  | 3.54                                    |
| 6   | 10  | 80.00                         | 20.00                     | 15.00                  | 3.46                                    |
| 7   | 11  | 40.00                         | 20.00                     | 45.00                  | 3.07                                    |
| 3   | 12  | 40.00                         | 25.00                     | 30.00                  | 3.09                                    |
| 5   | 13  | 40.00                         | 20.00                     | 15.00                  | 2.95                                    |
| 11  | 14  | 60.00                         | 15.00                     | 45.00                  | 3.38                                    |
| 13  | 15  | 60.00                         | 20.00                     | 30.00                  | 3.76                                    |
| 16  | 16  | 60.00                         | 20.00                     | 30.00                  | 3.76                                    |
| 9   | 17  | 60.00                         | 15.00                     | 15.00                  | 3.56                                    |

**Table S2**

| Source         | Sum of Squares         | df | Mean Square            | F Value | P-Value (Prob>F) |     |
|----------------|------------------------|----|------------------------|---------|------------------|-----|
| Model          | 1.44                   | 9  | 0.16                   | 343.38  | <0.0001          | *** |
| Residual       | 3.255 $\times 10^{-3}$ | 7  | 4.650 $\times 10^{-4}$ |         |                  |     |
| Lack of Fit    | 2.575 $\times 10^{-3}$ | 3  | 8.535 $\times 10^{-4}$ | 5.05    | 0.0759           |     |
| Pure Error     | 6.800 $\times 10^{-4}$ | 4  | 1.700 $\times 10^{-4}$ |         |                  |     |
| Cor Total      | 1.44                   | 16 |                        |         |                  |     |
| Adeq Precision | 54.040                 |    |                        |         |                  |     |
| C.V.%          | 0.62                   |    |                        |         |                  |     |

Table S3

| Factor         | Coefficient | Df | Standard Error         | 95%CI  |                        | P-Value (Prob>F) |     |
|----------------|-------------|----|------------------------|--------|------------------------|------------------|-----|
|                | Estimate    |    |                        | Low    | High                   |                  |     |
| Intercept      | 3.75        | 1  | 9.644×10 <sup>-3</sup> | 3.73   | 3.77                   | <0.0001          | *** |
| A              | 0.24        | 1  | 7.624×10 <sup>-3</sup> | 0.22   | 0.25                   | <0.0001          | *** |
| B              | 0.066       | 1  | 7.624×10 <sup>-3</sup> | 0.048  | 0.084                  | <0.0001          | *** |
| C              | 0.060       | 1  | 7.624×10 <sup>-3</sup> | 0.042  | 0.078                  | <0.0001          | *** |
| AB             | -0.010      | 1  | 0.011                  | -0.035 | 0.015                  | 0.3845           |     |
| AC             | -0.018      | 1  | 0.011                  | -0.043 | 7.995×10 <sup>-3</sup> | 0.1486           |     |
| BC             | 0.17        | 1  | 0.011                  | 0.14   | 0.19                   | <0.0001          | *** |
| A <sup>2</sup> | -0.40       | 1  | 0.011                  | -0.42  | -0.37                  | <0.0001          | *** |
| B <sup>2</sup> | -0.11       | 1  | 0.011                  | -0.14  | -0.086                 | <0.0001          | *** |
| C <sup>2</sup> | -0.11       | 1  | 0.011                  | -0.13  | -0.084                 | <0.0001          | *** |

Table S4

| Analytes     | 1      | 2      | 3      | 4      | 5      | Mean   | RSD% |
|--------------|--------|--------|--------|--------|--------|--------|------|
| Mangiferin   | 533.9  | 535.2  | 535.1  | 534.9  | 534.9  | 534.8  | 0.10 |
| Embinin      | 2272.5 | 2279.3 | 2281.6 | 2287.3 | 2291.9 | 2282.5 | 0.33 |
| Irislactin C | 866.3  | 869.7  | 871.5  | 873.4  | 875.9  | 871.4  | 0.42 |
| Irislactin A | 1068.9 | 1068.7 | 1066.8 | 1064.2 | 1063.0 | 1066.3 | 0.25 |
| Embinin A    | 446.7  | 447.9  | 448.7  | 449.5  | 450.8  | 448.7  | 0.35 |
| Embinin C    | 2013.3 | 2015.5 | 2013.6 | 2012.5 | 2010.3 | 2013.0 | 0.09 |

Table S5

| Analytes     | 1      | 2      | 3      | 4      | 5      | 6      | 7      | 8      | 9      | Mean   | RSD% |
|--------------|--------|--------|--------|--------|--------|--------|--------|--------|--------|--------|------|
| Mangiferin   | 533.9  | 535.2  | 535.1  | 534.9  | 534.9  | 535.2  | 534.8  | 536.9  | 540.7  | 535.7  | 0.38 |
| Embinin      | 2272.5 | 2279.3 | 2281.6 | 2289.6 | 2294.3 | 2300.4 | 2301.6 | 2301.8 | 2305.1 | 2291.8 | 0.51 |
| Irislactin C | 866.3  | 869.7  | 871.5  | 873.2  | 874.6  | 877.4  | 875.9  | 876.6  | 878.2  | 873.7  | 0.45 |
| Irislactin A | 1068.9 | 1068.7 | 1066.8 | 1076.2 | 1074.5 | 1073.1 | 1083.4 | 1076.2 | 1073.3 | 1073.5 | 0.47 |
| Embinin A    | 446.7  | 447.9  | 448.7  | 450.3  | 451.5  | 452.8  | 453.0  | 453.1  | 453.9  | 450.9  | 0.58 |
| Embinin C    | 2013.3 | 2015.5 | 2013.6 | 2030.4 | 2033.7 | 2034.8 | 2039.6 | 2037.1 | 2034.4 | 2028.0 | 0.53 |

**Table S6**

| <b>Analytes</b>     | <b>1</b> | <b>2</b> | <b>3</b> | <b>4</b> | <b>5</b> | <b>6</b> | <b>Mean</b> | <b>RSD%</b> |
|---------------------|----------|----------|----------|----------|----------|----------|-------------|-------------|
| <b>Mangiferin</b>   | 654.8    | 653.3    | 659.7    | 649.9    | 657.8    | 659.2    | 655.8       | 0.58        |
| <b>Embinin</b>      | 958.8    | 958.7    | 967.7    | 961.5    | 964.7    | 973.1    | 964.1       | 0.58        |
| <b>Irislactin C</b> | 623.3    | 623.7    | 629.5    | 631.2    | 632.8    | 625.7    | 627.7       | 0.64        |
| <b>Irislactin A</b> | 722.9    | 723.9    | 732.5    | 737.7    | 733.0    | 726.4    | 729.4       | 0.81        |
| <b>Embinin A</b>    | 1036.2   | 1035.5   | 1045.4   | 1047.7   | 1049.8   | 1038.1   | 1042.1      | 0.60        |
| <b>Embinin C</b>    | 1593.4   | 1589.2   | 1592.2   | 1594.0   | 1599.7   | 1589.7   | 1593.0      | 0.24        |

**Table S7**

| <b>Analytes</b>     | <b>0h</b> | <b>12h</b> | <b>24h</b> | <b>36h</b> | <b>48h</b> | <b>60h</b> | <b>72h</b> | <b>Mean</b> | <b>RSD%</b> |
|---------------------|-----------|------------|------------|------------|------------|------------|------------|-------------|-------------|
| <b>Mangiferin</b>   | 468.3     | 468.6      | 463.5      | 470.6      | 470.2      | 470.5      | 472.9      | 469.2       | 0.63        |
| <b>Embinin</b>      | 703.9     | 708.9      | 711.5      | 713.7      | 714.2      | 717.6      | 723.8      | 713.4       | 0.89        |
| <b>Irislactin C</b> | 451.3     | 457.4      | 454.0      | 456.5      | 459.1      | 462.2      | 463.1      | 457.7       | 0.93        |
| <b>Irislactin A</b> | 507.2     | 514.1      | 516.1      | 509.8      | 503.5      | 507.2      | 517.8      | 510.8       | 1.03        |
| <b>Embinin A</b>    | 762.5     | 766.5      | 769.5      | 766.1      | 775.7      | 767.9      | 777.2      | 769.3       | 0.69        |
| <b>Embinin C</b>    | 1154.7    | 1150.8     | 1157.8     | 1162.3     | 1166.5     | 1167.6     | 1167.8     | 1161.1      | 0.58        |

Table S8

| Analytes            | Sample/mg | Add/mg | Found/mg | Recovery% | Mean%  | RSD% |
|---------------------|-----------|--------|----------|-----------|--------|------|
| <b>Mangiferin</b>   | 0.451     | 0.452  | 0.901    | 99.72     | 100.34 | 1.76 |
|                     | 0.451     | 0.452  | 0.892    | 97.73     |        |      |
|                     | 0.451     | 0.452  | 0.907    | 101.05    |        |      |
|                     | 0.451     | 0.452  | 0.913    | 102.37    |        |      |
|                     | 0.451     | 0.452  | 0.911    | 101.93    |        |      |
|                     | 0.451     | 0.452  | 0.899    | 99.28     |        |      |
| <b>Embinin</b>      | 0.941     | 0.942  | 1.889    | 100.66    | 99.23  | 1.83 |
|                     | 0.941     | 0.942  | 1.869    | 98.54     |        |      |
|                     | 0.941     | 0.942  | 1.857    | 97.26     |        |      |
|                     | 0.941     | 0.942  | 1.881    | 99.81     |        |      |
|                     | 0.941     | 0.942  | 1.858    | 97.37     |        |      |
|                     | 0.941     | 0.942  | 1.899    | 101.72    |        |      |
| <b>Irislactin C</b> | 0.803     | 0.805  | 1.613    | 100.6     | 99.69  | 1.97 |
|                     | 0.803     | 0.805  | 1.599    | 98.86     |        |      |
|                     | 0.803     | 0.805  | 1.587    | 97.37     |        |      |
|                     | 0.803     | 0.805  | 1.617    | 101.1     |        |      |
|                     | 0.803     | 0.805  | 1.591    | 97.87     |        |      |
|                     | 0.803     | 0.805  | 1.627    | 102.34    |        |      |
| <b>Irislactin A</b> | 0.856     | 0.851  | 1.688    | 97.74     | 100.13 | 2.14 |
|                     | 0.856     | 0.851  | 1.719    | 101.39    |        |      |
|                     | 0.856     | 0.851  | 1.737    | 103.5     |        |      |
|                     | 0.856     | 0.851  | 1.698    | 98.92     |        |      |
|                     | 0.856     | 0.851  | 1.713    | 100.68    |        |      |
|                     | 0.856     | 0.851  | 1.695    | 98.57     |        |      |
| <b>Embinin A</b>    | 0.781     | 0.785  | 1.547    | 97.54     | 98.53  | 1.58 |
|                     | 0.781     | 0.785  | 1.572    | 100.72    |        |      |
|                     | 0.781     | 0.785  | 1.551    | 98.05     |        |      |
|                     | 0.781     | 0.785  | 1.568    | 100.21    |        |      |
|                     | 0.781     | 0.785  | 1.542    | 96.90     |        |      |
|                     | 0.781     | 0.785  | 1.549    | 97.79     |        |      |
| <b>Embinin C</b>    | 1.579     | 1.575  | 3.107    | 96.99     | 97.62  | 1.54 |
|                     | 1.579     | 1.575  | 3.159    | 100.29    |        |      |
|                     | 1.579     | 1.575  | 3.111    | 97.24     |        |      |
|                     | 1.579     | 1.575  | 3.129    | 98.39     |        |      |
|                     | 1.579     | 1.575  | 3.099    | 96.48     |        |      |
|                     | 1.579     | 1.575  | 3.096    | 96.29     |        |      |



**Table S9**

| Levels | Factors |                                           |         |
|--------|---------|-------------------------------------------|---------|
|        | A (%)   | B (mL 0.5 <sup>-1</sup> g <sup>-1</sup> ) | C (min) |
| -1     | 40      | 15:1                                      | 15      |
| 0      | 60      | 20:1                                      | 30      |
| 1      | 80      | 25:1                                      | 45      |
